# Supplementary material
Source: Springer Nature journal article supplement (https://www.springermedizin.de/resource/supplementary/12913_2007_622_MOESM3_ESM.pdf/9535816)

□ GPs ■ Specialists

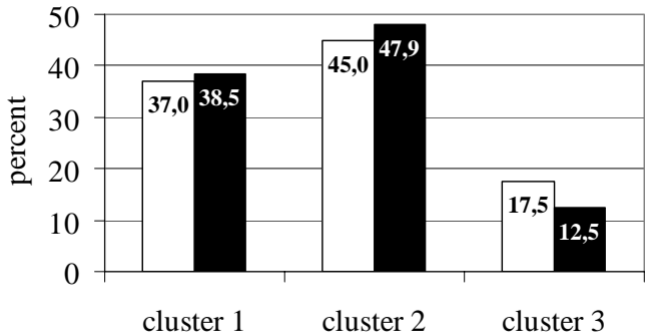

Supplement: MOESM3 [file 9535816]
